# Supplementary material for: Adult Arabs have higher risk for diabetes mellitus than Jews in Israel
Source: PLoS One. 2017 May 8;12(5):e0176661. doi: 10.1371/journal.pone.0176661 (PMC5421762; doi:10.1371/journal.pone.0176661)
Supplement: S1 File — (DOCX) [file pone.0176661.s006.docx]

**S1 File: Formula for the calculation of the weighted incidence rates**

For any year j and m age groups the ASR will be;

And thus the weighted ASR for 4 years and 16 age groups will be;

where;

and where the variance is given by;
